# Supplementary material
Source: publisher figshare collection journal article supplement (https://acs.figshare.com/ndownloader/files/13176434)
Supplement: Supplementary file 1 [file 13176434]

## Supporting Information

### On Fe–Fe Dumbbells in the Ideal and Real Structure of FeGa<sub>3</sub>

Frank R. Wagner<sup>1\*</sup>, Raul Cardoso-Gil<sup>1</sup>, Benoit Boucher<sup>1</sup>, Maik Wagner-Reetz<sup>1</sup>, Jörg Sischelschmidt<sup>1</sup>, Peter Gille<sup>2</sup>, Michael Baenitz<sup>1</sup>, Yuri Grin<sup>1\*</sup>

<sup>1</sup> Max-Planck-Institut für Chemische Physik fester Stoffe, Nöthnitzer Straße 40, 01187 Dresden, Germany.

<sup>2</sup> Ludwig-Maximilians-Universität München, Theresienstraße 41, 80333 München, Germany.

Content:

- Results of quantum-chemical calculations.
- Crystallographic data and details of crystal structure refinements.
- **Electron spin resonance (ESR) spectra and remarks.**

Table S1. Decomposition of ELI-D topological features for FeGa<sub>3</sub> (attractor) at midpoint  $r_c$  of Fe-Fe internuclear line along  $z(i)$ ;  $\tilde{Y}_D^\alpha(r_c) = 1.01$ ;  $\rho_\alpha(r_c) = 0.0193$ ;  $\tilde{V}_D^\alpha(r_c) = 52.3$ .

| Spin a      | $\frac{\rho''}{\rho} +$ | $\frac{\tilde{V}_D''}{\tilde{V}_D} +$ | $2\frac{\rho'}{\rho} \frac{\tilde{V}_D'}{\tilde{V}_D}$ | $= \frac{\tilde{Y}_D''}{\tilde{Y}_D}$ |
|-------------|-------------------------|---------------------------------------|--------------------------------------------------------|---------------------------------------|
| $z(i)$      | +1.20                   | -2.96                                 | 0                                                      | -1.76                                 |
| $x$         | -0.23                   | +0.12                                 | 0                                                      | -0.11                                 |
| $y$         | -0.15                   | +0.02                                 | 0                                                      | -0.13                                 |
| <i>type</i> | (3, -1)                 | (3, +1)                               | ---                                                    | (3, -3)                               |
| Sum         | +0.82                   | -2.82                                 | 0                                                      | -2.00                                 |

Table S2. Decomposition of ELI-D topological features for Fe<sub>2</sub>(CO)<sub>9</sub> (saddle point) at midpoint  $r_c$  of Fe-Fe internuclear line along  $z(i)$ ;  $\tilde{Y}_D^\alpha(r_c) = 0.83$ ;  $\rho_\alpha(r_c) = 0.0238$ ;  $\tilde{V}_D^\alpha(r_c) = 35.0$ .

| Spin a      | $\frac{\rho''}{\rho} +$ | $\frac{\tilde{V}_D''}{\tilde{V}_D} +$ | $2\frac{\rho'}{\rho} \frac{\tilde{V}_D'}{\tilde{V}_D}$ | $= \frac{\tilde{Y}_D''}{\tilde{Y}_D}$ |
|-------------|-------------------------|---------------------------------------|--------------------------------------------------------|---------------------------------------|
| $z(i)$      | +2.35                   | -3.38                                 | 0                                                      | -1.03                                 |
| $x$         | +0.10                   | -0.05                                 | 0                                                      | +0.05                                 |
| $y$         | +0.10                   | -0.05                                 | 0                                                      | +0.05                                 |
| <i>type</i> | (3, +3)                 | (3, -3)                               | ---                                                    | (3, +1)                               |
| Sum         | +2.55                   | -3.48                                 | 0                                                      | -0.93                                 |

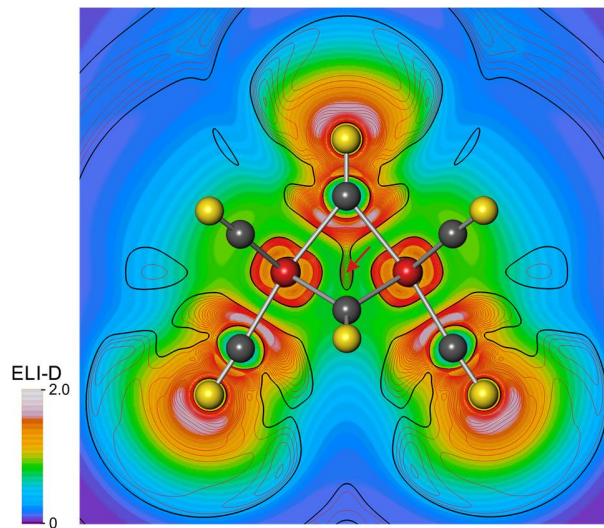

Figure S1. ELI-D slice for Fe<sub>2</sub>(CO)<sub>9</sub> using indicated color-map; isolines of the relative ELI-D Laplacian in the range  $-2 \leq \nabla^2 \tilde{Y}_D^\alpha / \tilde{Y}_D^\alpha \leq -0.2$  are shown in red, isoline of  $\nabla^2 \tilde{Y}_D^\alpha / \tilde{Y}_D^\alpha = 0$  is shown in black; Fe-Fe bond midpoint with negative ELI-D Laplacian is indicated by a red arrow; Fe, C, and O atoms are shown as red, grey, and yellow spheres, respectively.

Table S3. Crystallographic data and refinement of the ideal crystal structure of FeGa<sub>3</sub> (crystal 1)

|                                                                             |                                                                       |
|-----------------------------------------------------------------------------|-----------------------------------------------------------------------|
| Molar mass                                                                  | 265.01                                                                |
| Crystal color, shape                                                        | Gray, prismatic                                                       |
| Crystal dimensions (mm <sup>3</sup> )                                       | 0.100 × 0.100 × 0.080                                                 |
| Space group, Z                                                              | <i>P</i> 4 <sub>2</sub> / <i>mnm</i> (no. 136), 4                     |
| Lattice parameters (pm)                                                     | <i>a</i> = 626.53(1)                                                  |
| (from powder data)                                                          | <i>c</i> = 655.85(2)                                                  |
| <i>V</i> (10 <sup>6</sup> pm <sup>3</sup> ), <i>ρ</i> (g cm <sup>-3</sup> ) | 257.45(2), 6.84                                                       |
| Diffractometer, detector                                                    | Rigaku AFC7, CCD Saturn724+                                           |
| Radiation                                                                   | Mo <i>K</i> α ( <i>λ</i> = 71.073 pm)                                 |
| Exposures, steps (degree)                                                   | 720, <i>φ</i> = 0.5                                                   |
| Absorption correction                                                       | Multi-scan ( <i>μ</i> = 379.8 cm <sup>-1</sup> )                      |
| <i>T</i> <sub>min</sub> / <i>T</i> <sub>max</sub>                           | 0.681 / 1.000                                                         |
| 2 $\theta$ <sub>max</sub>                                                   | 80.5°                                                                 |
| <i>hkl</i> range                                                            | -11 < <i>h</i> < 8<br>-11 < <i>k</i> < 7<br>-11 < <i>l</i> < 11       |
| Measured/unique reflections                                                 | 3059 / 466                                                            |
| <i>R</i> (int)                                                              | 0.029                                                                 |
| Observation criteria                                                        | <i>F</i> ( <i>hkl</i> ) > 4 $\sigma$ <i>F</i> ( <i>hkl</i> )          |
| Refinement                                                                  | Full-matrix least-squares on <i>F</i> <sup>2</sup><br>(16 parameters) |
| <i>R</i> ( <i>F</i> ), <i>R</i> <sub>w</sub> , goodness-of-fit              | 0.033, 0.036, 1.194                                                   |
| $\Delta\rho_{\min}$ , $\Delta\rho_{\max}$ (e Å <sup>-3</sup> )              | -1.84, 2.95                                                           |

Table S4. Atomic position and anisotropic displacement parameters for FeGa<sub>3</sub>.

| Atom                   | Fe                     | Ga1        | Ga2                      |
|------------------------|------------------------|------------|--------------------------|
| Site                   | 4 <i>f</i>             | 4 <i>c</i> | 8 <i>j</i>               |
| <i>x/a</i>             | 0.15639(8)             | 0          | 0.84433(5)               |
| <i>y/b</i>             | <i>x</i>               | ½          | - <i>x</i>               |
| <i>z/c</i>             | 0                      | 0          | 0.23790(7)               |
| s.o.f.                 | 1.0                    | 1.0        | 1.0                      |
| <i>U</i> <sub>11</sub> | 54(2)                  | 124(3)     | 91(2)                    |
| <i>U</i> <sub>22</sub> | <i>U</i> <sub>11</sub> | 60(2)      | <i>U</i> <sub>11</sub>   |
| <i>U</i> <sub>33</sub> | 46(2)                  | 134(3)     | 81(2)                    |
| <i>U</i> <sub>12</sub> | -2(2)                  | 18(2)      | 6(1)                     |
| <i>U</i> <sub>13</sub> | 0                      | 0          | 21(1)                    |
| <i>U</i> <sub>23</sub> | 0                      | 0          | - <i>U</i> <sub>13</sub> |
| <i>U</i> (iso/eq)      | 51(2)                  | 106(2)     | 88(1)                    |

By considering the strong anisotropy of atomic displacement parameters (ADPs) for the Ga1 position (*U*<sub>11</sub> ≈ *U*<sub>33</sub> >> *U*<sub>22</sub>, Table S2) a split model for this Ga site was applied, yielding analogous results as described in the crystal structure refinement of RuGa<sub>3</sub> [50].

Independently, after the refinement considering the 'Fe2' position a further residual maximum in the difference Fourier (coordinates *x y z* = 0 ½ 0.048) was found, close to Ga1. This additional maximum was considered in the refinement and was assigned as 'Ga3'. Both Ga1 and 'Ga3' were isotropically refined, fixing *U*<sub>11</sub> for 'Ga3' equal to *U*<sub>eq</sub> of Ga2 (90 pm<sup>2</sup>). The site occupation factor was restrained as the complement for the Ga1 position (Ga1(s.o.f.) + 'Ga3'(s.o.f.) = 1) and with the constrain that 'Fe2'(s.o.f.) = 'Ga3'(s.o.f.). The resulting residual value is higher but still within a satisfactory range (*R*1 = 0.045)

taking into account that some atomic positions were isotropically refined. The crystal structure refinement shows the additional 'Ga3' site splitting parallel to [001] is in direct connection with the presence of 'Fe2' in the neighboring trigonal prism (Ga1–Fe2' = 237 pm).

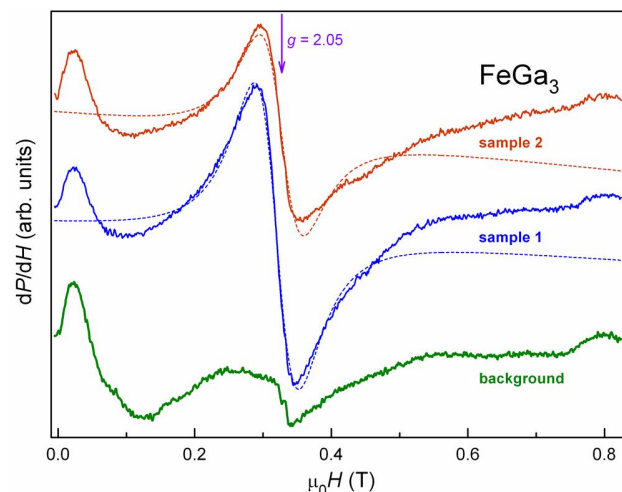

Figure S2. ESR spectra of two FeGa<sub>3</sub> samples and paraffin filled suprasil tube (background).

Figure S2 shows ESR spectra (first derivative of absorbed microwave power, *dP/dH*, vs. external magnetic field *H*) of FeGa<sub>3</sub> and a paraffin filled suprasil tube („background“) taken at a microwave frequency of 9.4 GHz and a temperature of 295 K. The two ESR samples of FeGa<sub>3</sub> have comparable masses (11.1 mg and 11.2 mg) and originate from the two batches discussed in this paper, „sample 1“ and „sample 2“, respectively. The spectra amplitudes of FeGa<sub>3</sub> are normalized to the resonator quality factor which moderately differs for the two samples. Note the considerable background contribution to the FeGa<sub>3</sub> spectra. The dashed lines denote Lorentzian line shapes at a resonance field corresponding to an effective *g*-value of *g* = 2.05. This demonstrates the existence of ESR active centers in the two FeGa<sub>3</sub> samples. The intensities of the two Lorentzian lines have a ratio of 2.6, i.e. the concentration of ESR-active centers in sample 1 is considerably higher than in sample 2.

The temperature dependencies of the FeGa<sub>3</sub> ESR parameters are well in agreement with those reported previously<sup>10</sup>.

This material is available free of charge via the Internet at <http://pubs.acs.org>.
